# Supplementary material for: Comparison of the Binding of Reversible Inhibitors to Human Butyrylcholinesterase and Acetylcholinesterase: A Crystallographic, Kinetic and Calorimetric Study
Source: PubMed Central journal article supplement (PMC6149722; doi:10.3390/molecules22122098), 2017-11-29

## Supplementary information

### Comparison of the Binding of Reversible Inhibitors to Human Butyrylcholinesterase and Acetylcholinesterase: A Crystallographic, Kinetic and Calorimetric Study.

Terrone L. Rosenberry, Xavier Brazzolotto, Ian R. Macdonald, Marielle Wandhammer, Marie Trovaslet-Leroy, Sultan Darvesh and Florian Nachon

**Table S1:** Data collection and refinement statistics. Calculated using Phenix (Adams *et al* Acta Cryst. D 2010;66:213-221).  $R\text{-work} = \sum |f_o - |f_c|| / \sum |f_o|$ ,  $f_o$  and  $f_c$  are observed and calculated structure factors, R-free set uses about thousands randomly chosen reflections. Statistics for the highest-resolution shell are shown in parentheses.

| BChE source                                        | CHO-K1                        | CHO-K1                           | CHO-K1                        | Drosophila S2                  | Drosophila S2                 |
|----------------------------------------------------|-------------------------------|----------------------------------|-------------------------------|--------------------------------|-------------------------------|
| Ligand                                             | Decamethonium                 | Ethopropazine                    | Huprine 19                    | Thioflavine T                  | Propidium                     |
| pdb code                                           | 6ep4                          | 6epq                             | 6eqq                          | 6esy                           | 6esj                          |
| <b>Data collection</b>                             |                               |                                  |                               |                                |                               |
| X-ray source - beamline                            | ESRF - ID14-4                 | ESRF - ID23-2                    | ESRF ID29-1                   | ESRF - ID23-1                  | ESRF - ID14-4                 |
| wavelength (Å)                                     | 0.934                         | 0.87260                          | 0.979084                      | 0.97242                        | 1.00442                       |
| Resolution range (Å)<br>(highest-resolution shell) | 42.39 - 2.3<br>(2.382 - 2.3)  | 54.89 - 2.349<br>(2.433 - 2.349) | 54.55 - 2.4<br>(2.486 - 2.4)  | 39.35 - 2.8<br>(2.9 - 2.8)     | 37.5 - 2.98<br>(3.087 - 2.98) |
| space group                                        | I422                          | I 4 2 2                          | I 4 2 2                       | P 21 21 21                     | P 21 21 21                    |
| unit cell parameters (Å)                           | 154.9 154.9 132.2<br>90 90 90 | 155.2 155.2 135.3<br>90 90 90    | 154.3 154.3 134.1<br>90 90 90 | 74.27 79.25 228.92<br>90 90 90 | 75.0 79.2 228.3<br>90 90 90   |
| Total reflections                                  | 325422 (18524)                | 226970 (22192)                   | 302500 (28658)                | 155637 (11402)                 | 96496 (9357)                  |
| Unique reflections                                 | 35717 (3390)                  | 34489 (3379)                     | 31862 (3154)                  | 33783 (3197)                   | 27721 (2638)                  |
| Multiplicity                                       | 9.1 (5.5)                     | 6.6 (6.6)                        | 9.5 (9.1)                     | 4.6 (3.4)                      | 3.5 (3.5)                     |
| Completeness (%)                                   | 99.30 (95.90)                 | 99.50 (98.57)                    | 99.91 (100.00)                | 98.51 (94.83)                  | 96.74 (93.55)                 |
| Mean I/σ (I)                                       | 19.63 (4.82)                  | 19.16 (2.26)                     | 17.14 (2.21)                  | 13.09 (1.01)                   | 10.83 (2.01)                  |
| Wilson B-factor                                    | 41.24                         | 45.19                            | 46.54                         | 75.75                          | 72.68                         |
| R-merge                                            | 0.05305 (0.3782)              | 0.07518 (0.8835)                 | 0.09373 (0.922)               | 0.07808 (1.073)                | 0.09197 (0.5627)              |
| R-meas                                             | 0.05618 (0.4171)              | 0.08175 (0.96)                   | 0.0991 (0.9772)               | 0.08845 (1.264)                | 0.1087 (0.6604)               |
| R-pim                                              | 0.01813 (0.1694)              | 0.03156 (0.3698)                 | 0.03181 (0.3206)              | 0.04045 (0.6528)               | 0.05716 (0.3415)              |
| CC1/2                                              | 0.999 (0.939)                 | 0.999 (0.805)                    | 0.999 (0.807)                 | 0.998 (0.531)                  | 0.995 (0.728)                 |
| CC*                                                | 1 (0.984)                     | 1 (0.945)                        | 1 (0.945)                     | 1 (0.833)                      | 0.999 (0.918)                 |
| <b>Refinement statistics</b>                       |                               |                                  |                               |                                |                               |
| Reflections used                                   | 35643 (3390)                  | 34471 (3378)                     | 31856 (3154)                  | 33659 (3192)                   | 27718 (2638)                  |
| Reflections for R-free                             | 1999 (190)                    | 1034 (101)                       | 1594 (158)                    | 1635 (146)                     | 970 (93)                      |
| R-work                                             | 0.1722 (0.2320)               | 0.1876 (0.2968)                  | 0.1708 (0.2489)               | 0.2059 (0.3758)                | 0.2212 (0.3251)               |
| R-free                                             | 0.2114 (0.2739)               | 0.2360 (0.3659)                  | 0.1988 (0.3078)               | 0.2615 (0.4117)                | 0.2995 (0.4474)               |
| CC(work)                                           | 0.951 (0.788)                 | 0.961 (0.861)                    | 0.961 (0.904)                 | 0.943 (0.664)                  | 0.937 (0.706)                 |
| CC(free)                                           | 0.930 (0.772)                 | 0.939 (0.805)                    | 0.937 (0.874)                 | 0.930 (0.405)                  | 0.897 (0.466)                 |
| Number of non-H atoms                              | 4614                          | 4647                             | 4610                          | 8775                           | 8810                          |
| macromolecule                                      | 4211                          | 4225                             | 4211                          | 8370                           | 8379                          |
| ligands                                            | 158                           | 185                              | 190                           | 364                            | 290                           |
| solvent                                            | 245                           | 237                              | 209                           | 41                             | 141                           |
| Protein residues                                   | 523                           | 526                              | 526                           | 1070                           | 1053                          |
| RMSD (bonds ; Å)                                   | 0.004                         | 0.003                            | 0.003                         | 0.007                          | 0.004                         |
| RMSD (angles ; deg)                                | 0.72                          | 0.70                             | 0.64                          | 1.12                           | 0.90                          |
| Ramachandran favored (%)                           | 96.72                         | 95.80                            | 95.04                         | 94.09                          | 93.33                         |
| Ramachandran allowed (%)                           | 2.70                          | 4.20                             | 4.96                          | 5.82                           | 6.67                          |
| Ramachandran outliers (%)                          | 0.58                          | 0.00                             | 0.00                          | 0.10                           | 0.00                          |
| Rotamer outliers (%)                               | 0.00                          | 0.22                             | 0.00                          | 0.00                           | 0.00                          |
| Clashscore                                         | 4.28                          | 4.50                             | 4.17                          | 12.75                          | 18.26                         |
| Average B-factor (Å <sup>2</sup> )                 | 49.83                         | 57.56                            | 60.38                         | 83.89                          | 81.25                         |
| macromolecules (Å <sup>2</sup> )                   | 48.12                         | 55.87                            | 59.01                         | 81.61                          | 79.95                         |
| ligands (Å <sup>2</sup> )                          | 90.08                         | 96.14                            | 88.18                         | 138.47                         | 129.07                        |
| solvent (Å <sup>2</sup> )                          | 53.19                         | 57.45                            | 62.74                         | 64.70                          | 60.40                         |
| Number of TLS groups                               | 1                             | 6                                | 6                             | 2                              | 2                             |

**Figure S1:** Complexes of human BChE with decamethonium (pdb 6ep4), thioflavin T (pdb 6esy), ethopropazine (pdb 6eqp), huprine 19 (pdb 6eqq) and propidium (pdb 6esj). The ligands are represented in balls and sticks with the volumetric representation of the 2Fo-Fc electron density maps of each ligand contoured at 1 sigma level. Key binding site residues in the vicinity of the ligand are represented in stick.

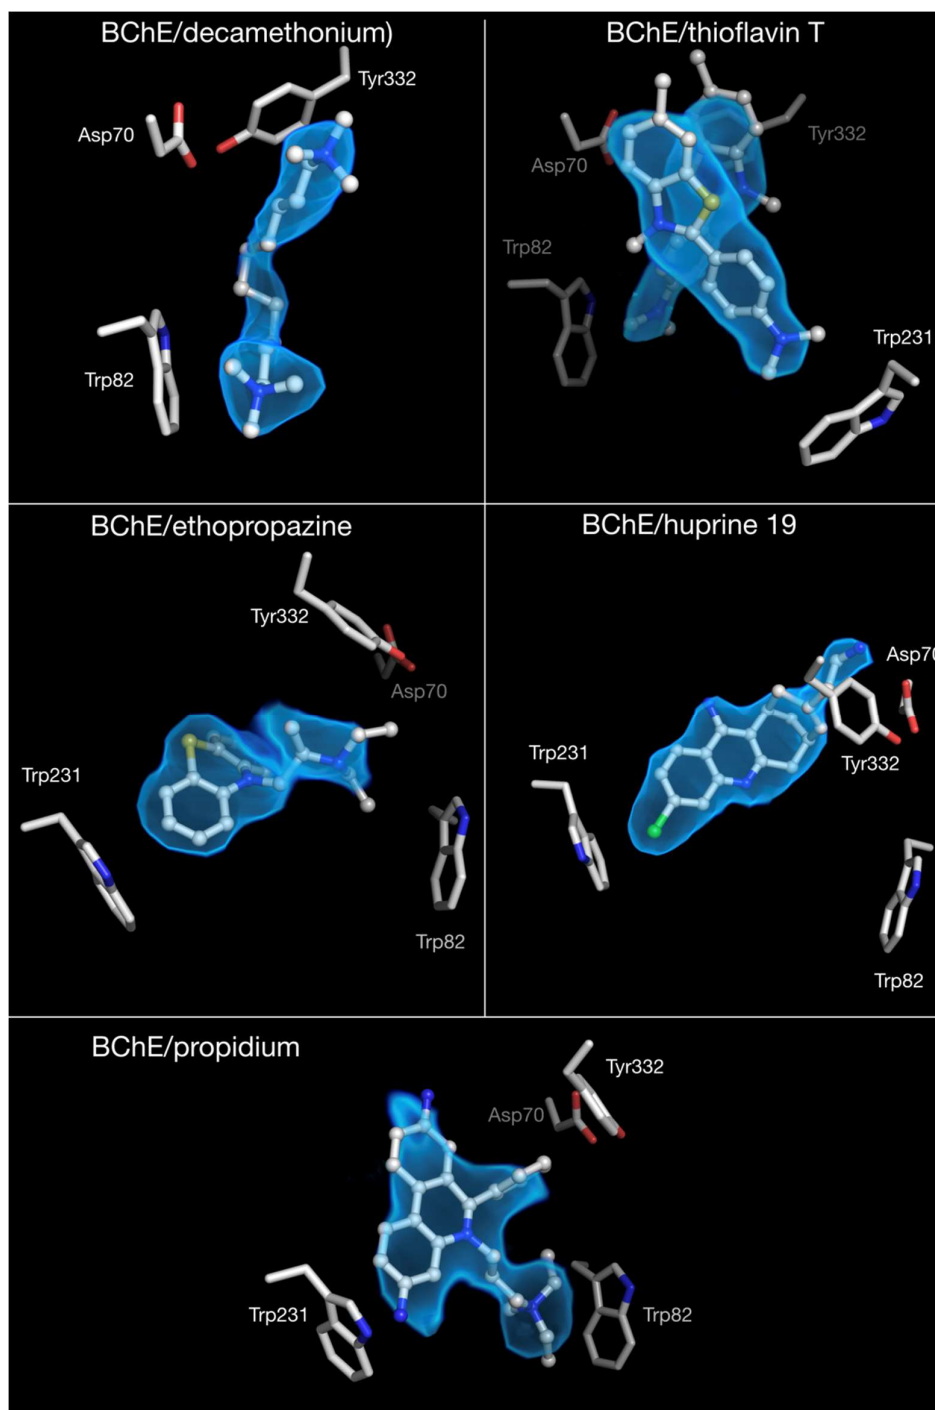

**Table S2:** Concentrations of ligand and protein used for ITC. Enzyme solutions were prepared from pure stock solutions by dilution into degassed buffer (10 mM HEPES with 10 mM NaCl at pH 7.4 for BChE, and 20 mM Tris-HCl with 50 mM NaCl at pH 8.0 for AChE) and filtered on 0.22 $\mu$ m. Ligand dilutions were prepared from stock solutions prepared in respective buffers (10 mM HEPES with 10 mM NaCl at pH 7.4 for BChE and 20 mM Tris-HCl with 50 mM NaCl at pH 8.0 for AChE) realized by weighing of pure crystalline powder obtained from Sigma, except for ThT chloride which was recrystallized as previously described (Harel *et al* J. Am. Chem. Soc. 2008;130:7856-61).

| Compound      | Enzyme | [Protein] ( $\mu$ M) | [Ligand] (mM) |
|---------------|--------|----------------------|---------------|
| Edrophonium   | hAChE  | 55                   | 0.20          |
|               |        | 55                   | 0.35          |
|               |        | 55                   | 0.50          |
|               | hBChE  | 62                   | 1.00          |
|               |        | 133                  | 1.25          |
|               |        | 205                  | 5.00          |
| Ethopropazine | hAChE  | 75                   | 0.75          |
|               |        | 75                   | 1.00          |
|               |        | 75                   | 1.00          |
|               | hBChE  | 40                   | 0.50          |
|               |        | 40                   | 0.25          |
|               |        | 40                   | 0.25          |
| Propidium     | hAChE  | 91                   | 0.55          |
|               |        | 84                   | 0.88          |
|               |        | 75                   | 0.55          |
|               | hBChE  | 80                   | 1.00          |
|               |        | 75                   | 0.50          |
|               |        | 75                   | 0.30          |
| Thioflavin T  | hAChE  | 53                   | 1.25          |
|               | hBChE  | 30                   | 0.50          |
|               |        | 30                   | 0.50          |

**Figure S2:** Representative traces and fits of ITC experiments for human AChE (edrophonium and thioflavin T) and human BChE (propidium and thioflavin T). The concentrations of enzyme in the titration cell and concentrations of ligands in the titration syringe are shown. The Injection heats were determined by integration of the peak areas using the NanoAnalyze software v3.7.5 (*TA Instruments*). Data were analyzed using the independent binding model fitting function included in the software. See materials and methods section for further details.

**AChE 55  $\mu\text{M}$   
Edrophonium 350  $\mu\text{M}$**

$K_D=1.4\pm 0.4 \mu\text{M}$   
 $n=0.8\pm 0.3$   
 $\Delta H=-26.4\pm 8.9 \text{ kJ}\cdot\text{mol}^{-1}$   
 $\Delta G=-33.6\pm 0.8 \text{ kJ}\cdot\text{mol}^{-1}$   
 $\Delta S=-24.2 \text{ J}\cdot\text{mol}^{-1}\cdot\text{K}^{-1}$

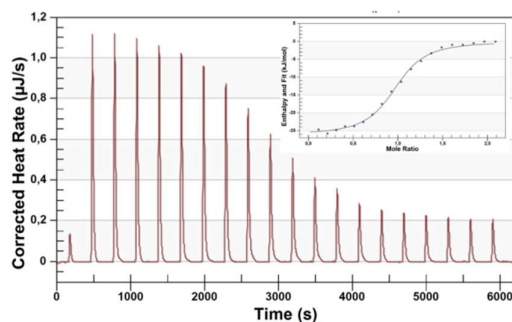

**BChE 80  $\mu\text{M}$   
Propidium 1 mM**

$K_D=2.1\pm 0.4 \mu\text{M}$   
 $n=0.8\pm 0.1$   
 $\Delta H=-43.1\pm 19.1 \text{ kJ}\cdot\text{mol}^{-1}$   
 $\Delta G=-31.7\pm 0.4 \text{ kJ}\cdot\text{mol}^{-1}$   
 $\Delta S=38.2 \text{ J}\cdot\text{mol}^{-1}\cdot\text{K}^{-1}$

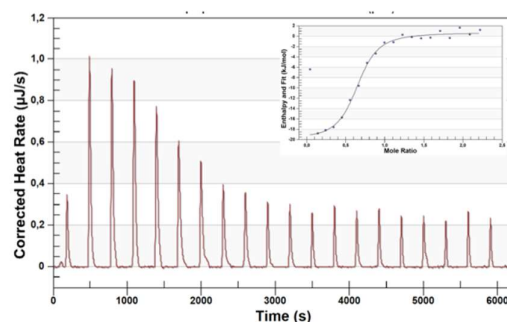

**AChE 53  $\mu\text{M}$   
Thioflavin T 1.25 mM**

$K_D=17.7 \mu\text{M}$   
 $n=1$   
 $\Delta H=-23.7 \text{ kJ}\cdot\text{mol}^{-1}$   
 $\Delta G=-27.2 \text{ kJ}\cdot\text{mol}^{-1}$   
 $\Delta S=-11.8 \text{ J}\cdot\text{mol}^{-1}\cdot\text{K}^{-1}$

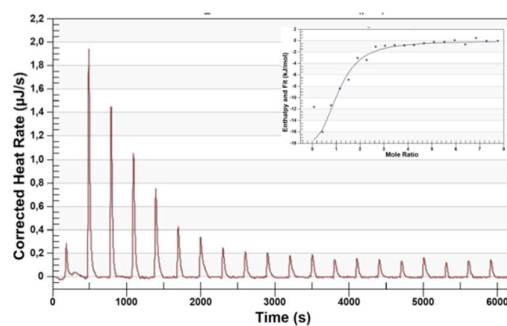

**BChE 30  $\mu\text{M}$   
Thioflavin T 500  $\mu\text{M}$**

$K_D=2.6\pm 0.5 \mu\text{M}$   
 $n=2.2\pm 0.1$   
 $\Delta H=-11.4\pm 0.6 \text{ kJ}\cdot\text{mol}^{-1}$   
 $\Delta G=-32.0\pm 0.6 \text{ kJ}\cdot\text{mol}^{-1}$   
 $\Delta S=-69.1 \text{ J}\cdot\text{mol}^{-1}\cdot\text{K}^{-1}$

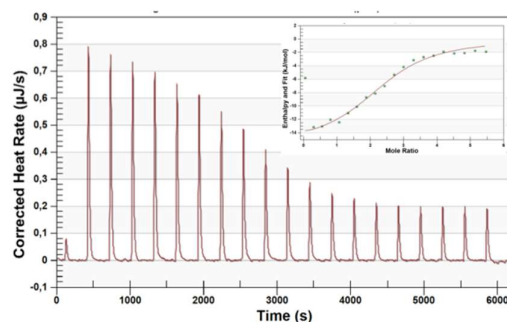

Supplement: molecules-22-02098-s001.pdf [file molecules-22-02098-s001.pdf]
